# Supplementary material
Source: PubMed Central journal article supplement (PMC7653688)
Supplement: NIHMS1638086-supplement-1supp.pdf [file NIHMS1638086-supplement-1supp.pdf]

## Supporting Information

Web Appendices, Figures, and Proofs referenced in Sections 2 and 4 are available with this paper at the Biometrics website on Wiley Online Library. Software implementing the assessment of our test's performance in R is available on Github at [https://github.com/rshinohara/distance\\_statistics\\_software/](https://github.com/rshinohara/distance_statistics_software/) (referenced in Section 2).
